# Supplementary material for: Identification of Disalicyloyl Curcumin as a Potential DNA Polymerase Inhibitor for Marek’s Disease Herpesvirus: A Computational Study Using Virtual Screening and Molecular Dynamics Simulations
Source: MDPI journal article supplement (doi:10.3390/molecules28186576), 2023-09-12
Supplement: s1 [file s1]

(A)

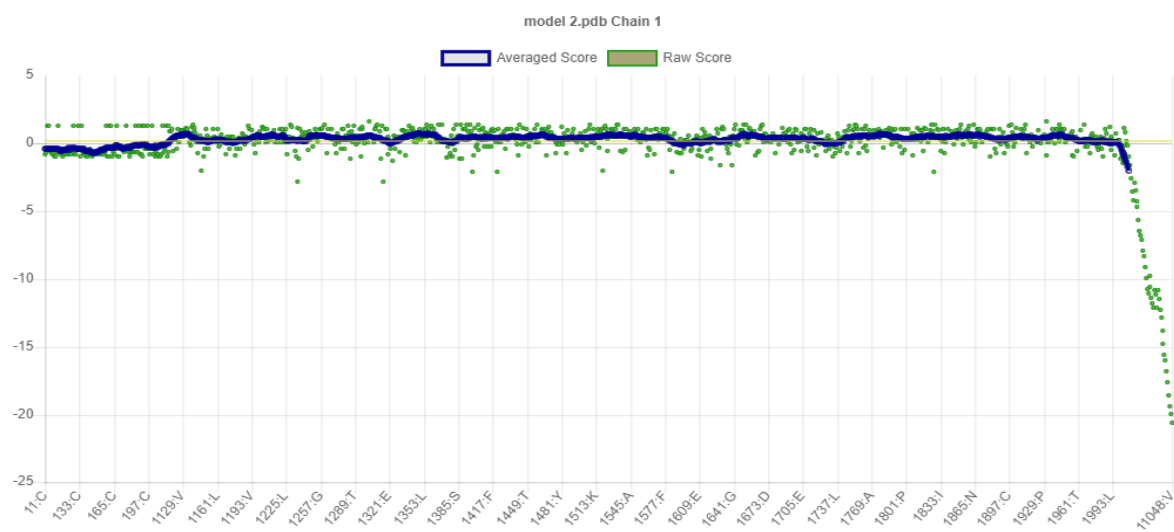

(B)

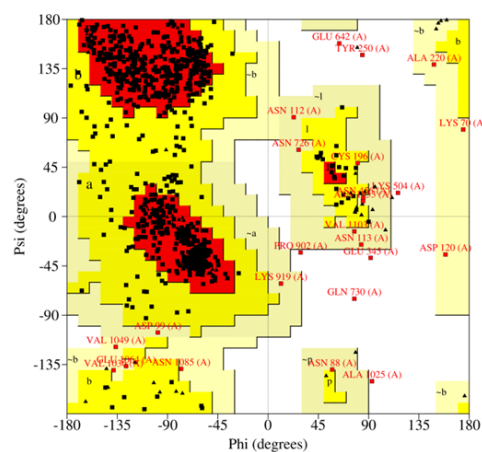

Plot statistics

|                                                      |      |        |
|------------------------------------------------------|------|--------|
| Residues in most favoured regions [A,B,L]            | 870  | 85.8%  |
| Residues in additional allowed regions [a,b,I,p]     | 121  | 11.9%  |
| Residues in generously allowed regions [-a,-b,-l,-p] | 17   | 1.7%   |
| Residues in disallowed regions                       | 6    | 0.6%   |
| Number of non-glycine and non-proline residues       | 1014 | 100.0% |
| Number of end-residues (excl. Gly and Pro)           | 2    |        |
| Number of glycine residues (shown as triangles)      | 60   |        |
| Number of proline residues                           | 48   |        |
| Total number of residues                             | 1124 |        |

Based on an analysis of 118 structures of resolution of at least 2.0 Angstroms and R-factor no greater than 20%, a good quality model would be expected to have over 90% in the most favoured regions.

(C)

Program: ERRAT2  
File: model 2.pdb  
Chain#:A  
Overall quality factor\*\*: 92.411

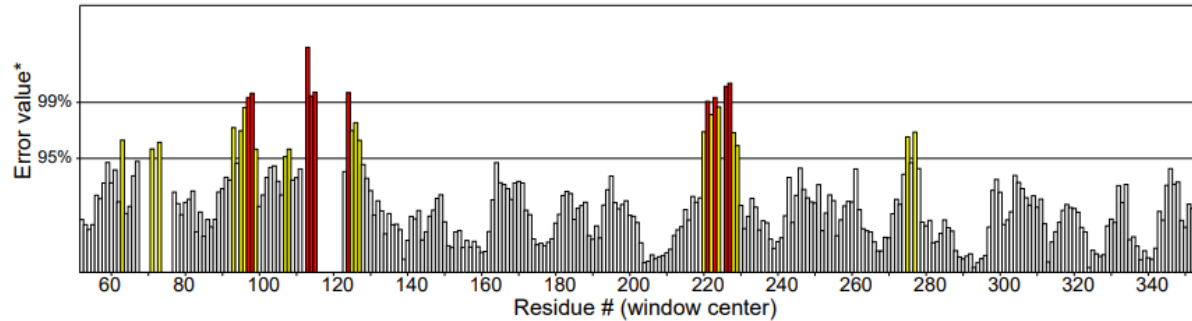

**Figure S1:** Validation of the 3D model of the MDV DNA polymerase enzyme **(A)** Distribution of amino acid residues according to their average scores to assess the structural quality of the predicted homology model. **(B)** Ramachandran plot. **(C)** ERRAT analysis of the predicted 3D model of the MDV DNA polymerase The black bars identify the misfolded region, the gray bars correspond to the error region between 95% and 99% and the white bars indicate the region with a lower error rate for protein folding

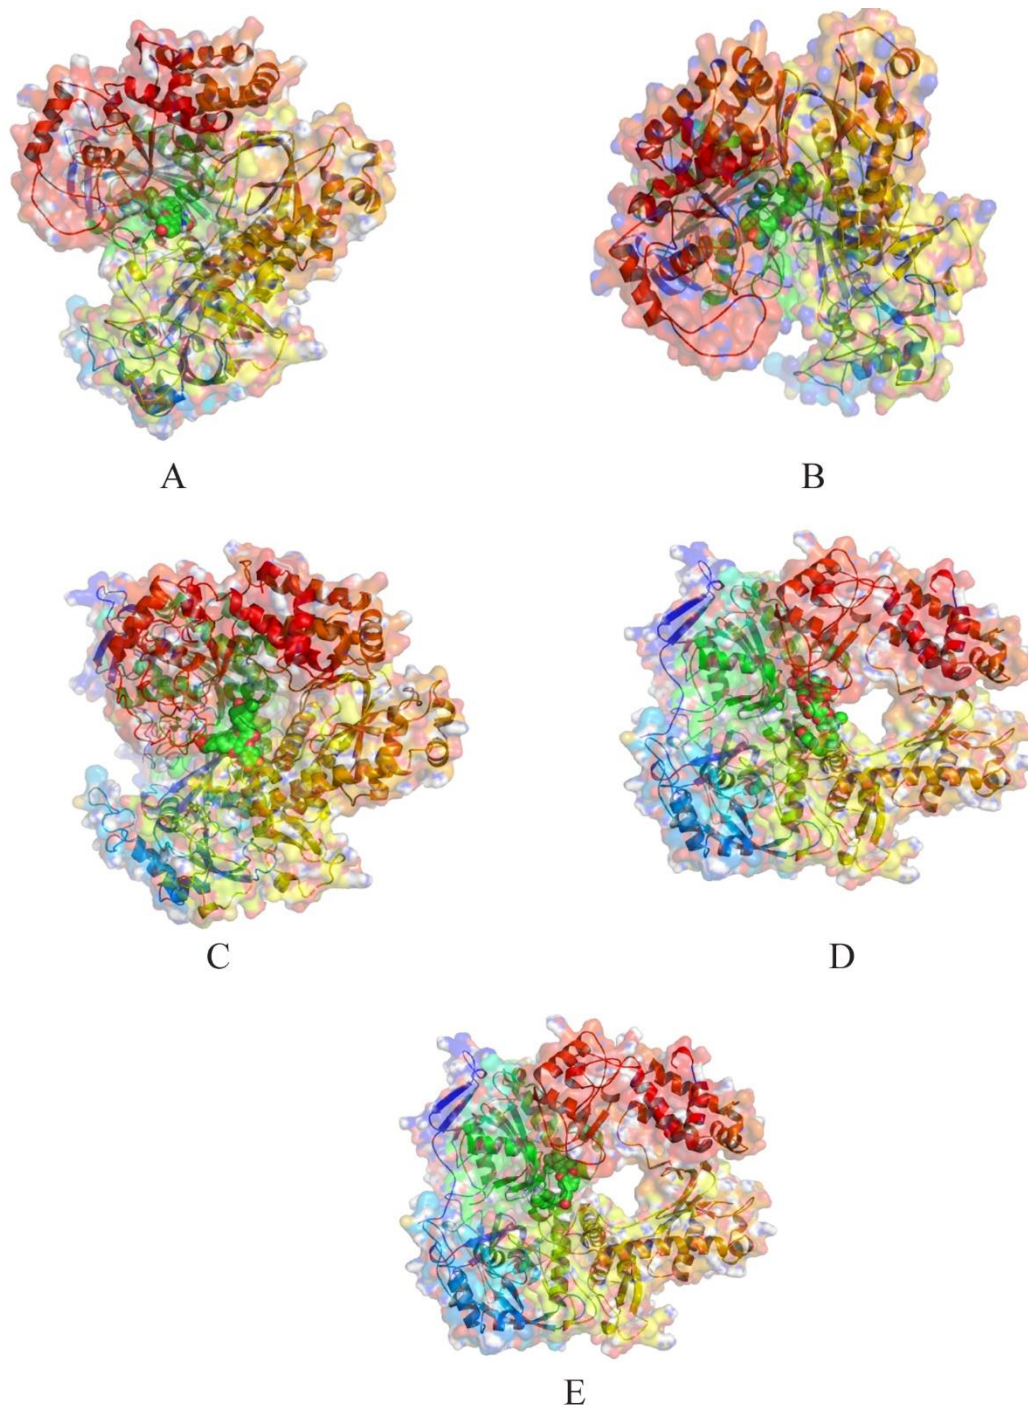

**Figure. S2.** 3D complex of the drug target with (A) Disalicyloyl curcumin, (B) Ferrocenyl curcumin (C) Curcumin dimer 1 (D) Curcumin dimer 2 (E)N-(4 Methoxyphenylpyrazole) Curcumin.
